# Supplementary material for: Comparison of Intravitreal Dexamethasone Implant and Ranibizumab in Vitrectomized Eyes with Diabetic Macular Edema
Source: Hindawi journal article supplement (doi:10.1155/2021/8882539), 2021-09-10
Supplement: f1 [file 8882539.f1.pdf]

| No.            | age     | sex | M0 VA | logMAR  | letter  | M0 CFT  | M1 VA | logMAR  |
|----------------|---------|-----|-------|---------|---------|---------|-------|---------|
| 1              | 59      | M   | 0.1   | 1       | 35      | 393     | 0.16  | 0.8     |
| 2              | 68      | M   | 0.2   | 0.7     | 50      | 407     | 0.2   | 0.7     |
| 3              | 65      | M   | 0.4   | 0.4     | 65      | 371     | 0.5   | 0.3     |
| 4              | 49      | F   | 0.3   | 0.52    | 59      | 405     | 0.7   | 0.15    |
| 5              | 67      | F   | 0.16  | 0.8     | 45      | 426     | 0.5   | 0.3     |
| 6              | 65      | M   | 0.1   | 1       | 35      | 713     | 0.2   | 0.7     |
| 7              | 39      | M   | 0.4   | 0.4     | 65      | 393     | 0.4   | 0.4     |
| 8              | 69      | M   | 0.1   | 1       | 35      | 757     | 0.3   | 0.52    |
| 9              | 54      | F   | 0.2   | 0.7     | 50      | 399     | 0.2   | 0.7     |
| 10             | 72      | M   | 0.2   | 0.7     | 50      | 353     | 0.3   | 0.52    |
| 11             | 61      | M   | 0.025 | 1.6     | 5       | 650     | 0.1   | 1       |
| 12             | 44      | M   | 0.05  | 1.3     | 20      | 712     | 0.2   | 0.7     |
| 13             | 67      | F   | 0.4   | 0.4     | 65      | 310     | 0.5   | 0.3     |
| 14             | 51      | M   | 0.16  | 0.8     | 45      | 696     | 0.2   | 0.7     |
| 15             | 48      | M   | 0.2   | 0.7     | 50      | 414     | 0.4   | 0.4     |
| 16             | 49      | m   | 0.7   | 0.15    | 77      | 375     | 0.9   | 0.05    |
| 17             | 69      | m   | 0.2   | 0.7     | 50      | 461     | 0.3   | 0.52    |
| 18             | 49      | m   | 0.2   | 0.7     | 50      | 421     | 0.2   | 0.7     |
| 19             | 76      | F   | 0.05  | 0.13    | 20      | 408     | 0.05  | 1.3     |
| 20             | 76      | F   | 0.4   | 0.4     | 65      | 349     | 0.2   | 0.7     |
| 21             | 64      | M   | 0.6   | 0.22    | 73      | 334     | 0.4   | 0.4     |
| 22             | 56      | M   | 0.2   | 0.7     | 50      | 438     | 0.1   | 1       |
| mean           | 59.8636 | 16M |       | 0.68273 | 48.1364 | 462.955 |       | 0.58455 |
| median         | 62.5    |     |       |         |         |         |       |         |
| SD             | 10.4111 | 6F  |       | 0.35056 | 17.4676 | 136.704 |       | 0.28833 |
| vs M0          |         |     |       |         |         |         |       | 0.23894 |
| VT OZD 22 eyes |         |     |       |         |         |         |       |         |

|    |    |   |      |      |    |     |      |      |
|----|----|---|------|------|----|-----|------|------|
| 1  | 77 | m | 0.4  | 0.4  | 65 | 323 | 0.4  | 0.4  |
| 2  | 52 | m | 0.3  | 0.52 | 59 | 312 | 0.5  | 0.3  |
| 3  | 61 | m | 0.3  | 0.52 | 59 | 498 | 0.4  | 0.4  |
| 4  | 69 | m | 0.3  | 0.52 | 59 | 417 | 0.3  | 0.52 |
| 5  | 67 | m | 0.16 | 0.8  | 45 | 596 | 0.16 | 0.8  |
| 6  | 52 | f | 0.4  | 0.4  | 65 | 470 | 0.4  | 0.4  |
| 7  | 64 | m | 0.3  | 0.52 | 59 | 484 | 0.5  | 0.3  |
| 8  | 61 | m | 0.3  | 0.52 | 59 | 481 | 0.2  | 0.7  |
| 9  | 61 | m | 0.16 | 0.8  | 45 | 314 | 0.16 | 0.8  |
| 10 | 53 | f | 0.16 | 0.8  | 45 | 501 | 0.3  | 0.52 |
| 11 | 66 | m | 0.3  | 0.52 | 59 | 431 | 0.3  | 0.52 |
| 12 | 75 | m | 0.05 | 1.3  | 20 | 443 | 0.05 | 1.3  |
| 13 | 67 | m | 0.1  | 1    | 35 | 458 | 0.2  | 0.7  |

|                            |             |       |         |         |            |       |         |
|----------------------------|-------------|-------|---------|---------|------------|-------|---------|
| 14                         | 58 m        | 0.4   | 0.4     | 65      | 421        | 0.5   | 0.3     |
| 15                         | 60 m        | 0.3   | 0.52    | 59      | 277        | 0.4   | 0.4     |
| 16                         | 54 f        | 0.025 | 1.6     | 5       | 413        | 0.1   | 1       |
| 17                         | 66 m        | 0.3   | 0.52    | 59      | 384        | 0.3   | 0.52    |
| 18                         | 60 f        | 0.3   | 0.52    | 59      | 734        | 0.16  | 0.8     |
| 19                         | 75 f        | 0.025 | 1.6     | 5       | 467        | 0.1   | 1       |
| 20                         | 39 m        | 0.5   | 0.3     | 70      | 380        | 0.5   | 0.3     |
| 21                         | 56 m        | 0.05  | 1.3     | 20      | 365 CF/15c |       | 2.3     |
| 22                         | 52 f        | 0.3   | 0.52    | 59      | 319        | 0.3   | 0.52    |
| 23                         | 39 m        | 0.4   | 0.4     | 65      | 517        | 0.2   | 0.7     |
| 24                         | 57 f        | 0.025 | 1.6     | 5       | 787        | 0.025 | 1.6     |
| 25                         | 52 f        | 0.05  | 1.3     | 20      | 443        | 0.1   | 1       |
| 26                         | 64 f        | 0.1   | 1       | 35      | 320        | 0.5   | 0.3     |
| mean                       | 59.8846 17M |       | 0.77692 | 46.1538 | 444.423    |       | 0.70769 |
| SD                         | 9.35754 9F  |       | 0.41185 | 20.5926 | 118.467    |       | 0.45364 |
| vs M0                      |             |       |         |         |            |       | 0.29127 |
| <b>VT Lucentis 26 eyes</b> |             |       |         |         |            |       |         |
| OZD vs Lucentis            | 0.99435     |       | 0.4064  | 0.72549 | 0.62919    |       | 0.27089 |

M1 CFT M2 VA logMAR M2 CFT M3 VA logMAR M3 CFT M4 VA logMAR M4 CFT

|         |      |         |         |      |         |         |     |         |          |
|---------|------|---------|---------|------|---------|---------|-----|---------|----------|
| 345     | 0.16 | 0.8     | 336     | 0.2  | 0.7     | 299     | 0.2 | 0.7     | 313      |
| 401     | 0.3  | 0.52    | 383     | 0.3  | 0.52    | 399     | 0.2 | 0.7     | 430      |
| 346     | 0.6  | 0.22    | 299     | 0.6  | 0.22    | 366     | 0.5 | 0.3     | 372      |
| 369     | 0.7  | 0.15    | 400     | 0.6  | 0.22    | 444     | 0.7 | 0.15    | 350      |
| 246     | 0.6  | 0.22    | 223     | 0.6  | 0.22    | 291     | 0.6 | 0.22    | 280      |
| 355     | 0.6  | 0.22    | 343     | 0.5  | 0.3     | 287     | 0.2 | 0.7     | 355      |
| 372     | 0.5  | 0.3     | 358     | 0.9  | 0.05    | 374     | 0.4 | 0.4     | 372      |
| 213     | 0.4  | 0.4     | 199     | 0.3  | 0.52    | 291     | 0.3 | 0.52    | 383      |
| 248     | 0.2  | 0.7     | 250     | 0.2  | 0.7     | 252     | 0.2 | 0.7     | 250      |
| 338     | 0.2  | 0.7     | 329     | 0.2  | 0.7     | 343     | 0.2 | 0.7     | 353      |
| 411     | 0.2  | 0.7     | 352     | 0.4  | 0.4     | 313     | 0.7 | 0.15    | 411      |
| 268     | 0.4  | 0.4     | 250     | 0.3  | 0.52    | 280     | 0.3 | 0.52    | 290      |
| 299     | 0.6  | 0.22    | 280     | 0.8  | 0.1     | 378     | 0.4 | 0.4     | 330      |
| 289     | 0.3  | 0.52    | 250     | 0.3  | 0.52    | 311     | 0.5 | 0.3     | 463      |
| 335     | 0.4  | 0.4     | 328     | 0.5  | 0.3     | 340     | 0.6 | 0.22    | 330      |
| 321     | 0.1  | 1       | 317     | 0.5  | 0.3     | 367     | 0.5 | 0.3     | 350      |
| 323     | 0.2  | 0.7     | 258     | 0.6  | 0.22    | 259     | 0.9 | 0.05    | 352      |
| 362     | 0.3  | 0.52    | 422     | 0.6  | 0.22    | 421     | 0.7 | 0.15    | 372      |
| 294     | 0.4  | 0.4     | 370     | 0.16 | 0.8     | 391     | 0.6 | 0.22    | 313      |
| 316     | 0.4  | 0.4     | 397     | 0.4  | 0.4     | 324     | 0.5 | 0.3     | 288      |
| 292     | 0.3  | 0.52    | 399     | 0.4  | 0.4     | 297     | 0.4 | 0.4     | 340      |
| 410     | 0.4  | 0.4     | 372     | 0.7  | 0.15    | 255     | 0.6 | 0.22    | 299      |
| 325.136 |      | 0.47318 | 323.409 |      | 0.38545 | 331     |     | 0.37818 | 345.2727 |
| 52.2262 |      | 0.21552 | 62.4985 |      | 0.2078  | 53.8466 |     | 0.20758 | 49.34128 |
| 0.00058 |      | 0.02385 | 0.00179 |      | 0.00162 | 0.00147 |     | 0.00122 | 0.000395 |

|     |      |      |     |      |      |     |      |      |     |
|-----|------|------|-----|------|------|-----|------|------|-----|
| 341 | 0.3  | 0.52 | 307 | 0.3  | 0.52 | 362 | 0.4  | 0.4  | 335 |
| 399 | 0.6  | 0.22 | 286 | 0.7  | 0.15 | 278 | 0.8  | 0.1  | 222 |
| 298 | 0.5  | 0.3  | 247 | 0.6  | 0.22 | 247 | 0.7  | 0.15 | 240 |
| 375 | 0.3  | 0.52 | 380 | 0.5  | 0.3  | 381 | 0.5  | 0.3  | 436 |
| 434 | 0.2  | 0.7  | 377 | 0.05 | 1.3  | 411 | 0.16 | 0.8  | 366 |
| 495 | 0.4  | 0.4  | 454 | 0.6  | 0.22 | 482 | 0.6  | 0.22 | 528 |
| 469 | 0.5  | 0.3  | 452 | 0.7  | 0.15 | 463 | 0.7  | 0.15 | 460 |
| 424 | 0.2  | 0.7  | 405 | 0.3  | 0.52 | 386 | 0.3  | 0.52 | 370 |
| 280 | 0.1  | 1    | 381 | 0.16 | 0.8  | 290 | 0.16 | 0.8  | 399 |
| 404 | 0.3  | 0.52 | 398 | 0.2  | 0.7  | 345 | 0.3  | 0.52 | 336 |
| 293 | 0.4  | 0.4  | 295 | 0.5  | 0.3  | 377 | 0.7  | 0.15 | 325 |
| 333 | 0.05 | 1.3  | 441 | 0.05 | 1.3  | 372 | 0.1  | 1    | 351 |
| 328 | 0.16 | 0.8  | 347 | 0.2  | 0.7  | 325 | 0.2  | 0.7  | 370 |

|         |      |         |         |      |         |         |      |         |          |
|---------|------|---------|---------|------|---------|---------|------|---------|----------|
| 390     | 0.6  | 0.22    | 358     | 0.7  | 0.15    | 377     | 0.8  | 0.1     | 344      |
| 240     | 0.5  | 0.3     | 238     | 0.5  | 0.3     | 232     | 0.5  | 0.3     | 331      |
| 400     | 0.05 | 1.3     | 399     | 0.1  | 1       | 403     | 0.2  | 0.7     | 499      |
| 324     | 0.2  | 0.7     | 447     | 0.4  | 0.4     | 312     | 0.2  | 0.7     | 598      |
| 634     | 0.16 | 0.8     | 718     | 0.2  | 0.7     | 617     | 0.1  | 1       | 666      |
| 443     | 0.1  | 1       | 521     | 0.16 | 0.8     | 597     | 0.1  | 1       | 514      |
| 285     | 0.6  | 0.22    | 385     | 0.9  | 0.05    | 368     | 0.5  | 0.3     | 367      |
| 328     | 0.2  | 0.7     | 500     | 0.5  | 0.3     | 626     | 0.6  | 0.22    | 367      |
| 314     | 0.4  | 0.4     | 315     | 0.5  | 0.3     | 305     | 0.7  | 0.15    | 378      |
| 544     | 0.2  | 0.7     | 535     | 0.4  | 0.4     | 662     | 0.3  | 0.52    | 462      |
| 732     | 0.05 | 1.3     | 205     | 0.05 | 1.3     | 390     | 0.05 | 1.3     | 415      |
| 284     | 0.05 | 1.3     | 295 ND  |      | 2.3     | 305 ND  |      | 2.3     | 343      |
| 223     | 0.2  | 0.7     | 217     | 0.5  | 0,3     | 228     | 0.6  | 1.3     | 221      |
| 385.154 |      | 0.66615 | 380.885 |      | 0.6072  | 390.038 |      | 0.60385 | 393.9615 |
| 115.936 |      | 0.348   | 111.322 |      | 0.50479 | 117.91  |      | 0.49566 | 103.6998 |
| 0.00014 |      | 0.02441 | 0.02535 |      | 0.0479  | 0.03764 |      | 0.04151 | 0.045567 |
| 0.02594 |      | 0.02659 | 0.03347 |      | 0.05736 | 0.03125 |      | 0.0459  | 0.04415  |

M5 VA logMAR M5 CFT M6 VA logMAR letter M6 CFT inj number

|          |      |         |          |      |          |          |                     |
|----------|------|---------|----------|------|----------|----------|---------------------|
| 0.2      | 0.7  | 351     | 0.05     | 1.3  | 20       | 382      | 3                   |
| 0.2      | 0.7  | 470     | 0.16     | 0.8  | 45       | 384      | 3                   |
| 0.4      | 0.4  | 389     | 0.3      | 0.52 | 59       | 400      | 3                   |
| 0.7      | 0.15 | 322     | 0.6      | 0.22 | 73       | 213      | 3                   |
| 0.6      | 0.22 | 265     | 0.7      | 0.15 | 77       | 253      | 3                   |
| 0.6      | 0.22 | 343     | 0.5      | 0.3  | 70       | 298      | 3                   |
| 0.5      | 0.3  | 358     | 0.5      | 0.3  | 70       | 358      | 3                   |
| 0.3      | 0.52 | 430     | 0.2      | 0.7  | 50       | 510      | 3                   |
| 0.2      | 0.7  | 250     | 0.2      | 0.7  | 50       | 347      | 3                   |
| 0.2      | 0.7  | 322     | 0.2      | 0.7  | 50       | 252      | 3                   |
| 0.2      | 0.7  | 352     | 0.05     | 1.3  | 20       | 748      | 3                   |
| 0.2      | 0.7  | 544     | 0.8      | 0.1  | 65       | 250      | 3                   |
| 0.5      | 0.3  | 299     | 0.8      | 0.1  | 80       | 280      | 3                   |
| 0.3      | 0.52 | 289     | 0.4      | 0.4  | 65       | 250      | 2                   |
| 0.5      | 0.3  | 298     | 0.6      | 0.22 | 73       | 380      | 2                   |
| 0.3      | 0.52 | 336     | 0.8      | 0.1  | 80       | 255      | 2                   |
| 0.6      | 0.22 | 300     | 0.9      | 0.05 | 82       | 223      | 2                   |
| 0.2      | 0.7  | 320     | 1        | 0    | 85       | 344      | 2                   |
| 0.7      | 0.15 | 315     | 0.7      | 0.15 | 77       | 189      | 2                   |
| 0.8      | 0.1  | 303     | 0.8      | 0.1  | 80       | 177      | 2                   |
| 0.7      | 0.15 | 289     | 0.9      | 0.05 | 82       | 158      | 2                   |
| 0.6      | 0.22 | 211     | 1        | 0    | 85       | 190      | 2                   |
| 0.417727 |      | 334.364 | 0.375455 |      | 65.36364 | 310.9545 | 2.59090909 3 inj 12 |
| 0.223951 |      | 71.5374 | 0.380547 |      | 18.68044 | 128.8069 | 0.49166608 2 inj 10 |
| 0.000577 |      | 0.00011 | 0.000592 |      |          | 0.000115 |                     |

|      |      |     |      |      |    |     |   |
|------|------|-----|------|------|----|-----|---|
| 0.4  | 0.4  | 341 | 0.4  | 0.4  | 65 | 334 | 4 |
| 0.9  | 0.05 | 319 | 0.4  | 0.4  | 65 | 221 | 4 |
| 0.8  | 0.1  | 215 | 0.4  | 0.4  | 65 | 223 | 4 |
| 0.5  | 0.3  | 361 | 0.5  | 0.3  | 70 | 345 | 5 |
| 0.16 | 0.8  | 372 | 0.05 | 1.3  | 20 | 364 | 5 |
| 0.6  | 0.22 | 431 | 0.3  | 0.52 | 59 | 563 | 5 |
| 0.7  | 0.15 | 465 | 0.4  | 0.4  | 65 | 452 | 5 |
| 0.3  | 0.52 | 358 | 0.3  | 0.52 | 59 | 367 | 5 |
| 0.16 | 0.8  | 359 | 0.3  | 0.52 | 59 | 345 | 5 |
| 0.5  | 0.3  | 446 | 0.6  | 0.22 | 73 | 314 | 5 |
| 0.2  | 0.7  | 449 | 0.8  | 0.1  | 80 | 342 | 5 |
| 0.05 | 1.3  | 289 | 0.1  | 1    | 35 | 440 | 5 |
| 0.3  | 0.52 | 389 | 0.3  | 0.52 | 59 | 363 | 5 |

|          |         |     |          |          |          |            |          |
|----------|---------|-----|----------|----------|----------|------------|----------|
| 0.9      | 0.05    | 362 | 1        | 0        | 50       | 343        | 6        |
| 0.2      | 0.7     | 331 | 0.2      | 0.7      | 50       | 341        | 6        |
| 0.05     | 1.3     | 415 | 0.1      | 1        | 35       | 399        | 6        |
| 0.2      | 0.7     | 454 | 0.2      | 0.7      | 50       | 444        | 6        |
| 0.05     | 1.3     | 643 | 0.05     | 1.3      | 20       | 621        | 6        |
| 0.05     | 1.3     | 494 | 0.05     | 1.3      | 20       | 684        | 6        |
| 0.5      | 0.3     | 478 | 0.4      | 0.4      | 65       | 494        | 6        |
| 0.5      | 0.3     | 344 | 0.7      | 0.15     | 77       | 388        | 6        |
| 0.3      | 0.52    | 299 | 0.3      | 0.52     | 59       | 387        | 7        |
| 0.3      | 0.52    | 395 | 0.3      | 0.52     | 59       | 367        | 7        |
| 0.05     | 1.3     | 528 | 0.05     | 1.3      | 20       | 270        | 7        |
| 0.05     | 1.3     | 291 | 0.05     | 1.3      | 20       | 334        | 7        |
| 0.3      | 0.52    | 204 | 0.6      | 0.22     | 73       | 245        | 7        |
| 0.625769 | 385.846 |     | 0.615769 | 52.76923 | 384.2308 | 5.57692308 | 4 inj 3  |
| 0.423658 | 117.643 |     | 0.402551 | 19.06327 | 108.5535 | 0.92707468 | 5 inj 10 |
| 0.031064 | 0.00577 |     | 0.048436 |          | 0.044047 |            | 6 inj 8  |
| 0.039771 | 0.04081 |     | 0.043424 | 0.028955 | 0.045435 | 8.5004E-17 |          |
